# Supplementary material for: Multidimensional Predictors of Health-Related Quality of Life in Parkinson’s Disease Using Ensemble Learning and Network Analysis
Source: Research Square preprint supplement (doi:10.21203/rs.3.rs-6755283/v1), 2025-06-17
Supplement: Supplementary file 1 [file e2f94388ee586b5c33b70085.docx]

**Supplementary table S1.** Feature importance of LASSO and XGBoost

|  | **Variables** | **LASSO** | **XGBoost** |
| --- | --- | --- | --- |
| PDQ-39 total | UPDRS_total | 0.010 | 0.106 |
| UPDRS_II | 0.003 | 0.010 |
| NMSS | 0.087 | 0.102 |
| NFOG-Q | 0.136 | 0.027 |
| BAI | 0.329 | 0.011 |
| BW_DSR | 0.034 | 0.016 |
| TurnPL_SLR | 0.012 | 0.022 |
| FESK | 0.177 | - |
| HY | 0.122 | - |
| Treatment_duration | 0.085 | - |
| FW_T10_MeanGyr | 0.063 | - |
| BDI | 0.062 | - |
| TurnFL_PSI_SampEnGyr | 0.062 | - |
| TurnFL_LELB_SampEnGyr | 0.061 | - |
| SPPB | 0.059 | - |
| TurnPR_LANK_SampEnAcc | 0.049 | - |
| TurnPR_CLL | 0.047 | - |
| BW_LANK_MaxJerk | 0.032 | - |
| BW_T10_MaxAcc | 0.030 | - |
| FW_PSI_SampEnAcc | 0.025 | - |
| TurnPR_DSR | 0.019 | - |
| FW_RANK_MaxGyr | 0.015 | - |
| FW_SampEnGyr_PSI | 0.005 | - |
| FW_RANK_SampEnAcc | 0.002 | - |
| TurnFR_SLR | - | 0.080 |
| SEE | - | 0.053 |
| BW_PSI_SampEnGyr | - | 0.043 |
| FW_RELB_RmsGyr | - | 0.037 |
| FW_RANK_MeanGyr | - | 0.036 |
| UPDRS_III | - | 0.035 |
| BW_RANK_SampEnGyr | - | 0.030 |
| TurnFR_RELB_SampEnGyr | - | 0.023 |
| TurnPL_T10_MaxAcc | - | 0.023 |
| TurnFL_RANK_SampEnAcc | - | 0.022 |
| TurnPL_RANK_MaxAcc | - | 0.021 |
| TurnFL_T10_MeanAcc | - | 0.017 |
| TurnFL_PSI_MaxAcc | - | 0.017 |
| PDSS2 | - | 0.015 |
| FW_RANK_MaxJerk | - | 0.014 |
| TurnFR_LELB_SampEnGyr | - | 0.014 |
| BW_PSI_RmsGyr | - | 0.011 |
| FW_T10_MaxAcc | - | 0.011 |
| Mobility | HY | 0.177 | 0.016 |
| NFOGQ | 0.082 | 0.050 |
| FW_RANK_Max Angular Jerk | 0.069 | 0.034 |
| BAI | 0.162 | - |
| UPDRS_II | 0.034 | - |
| UPDRS_IV | 0.011 | - |
| PDSS2 | 0.003 | - |
| FSS | 0.062 | - |
| Fall | 0.005 | - |
| FESK | 0.277 | - |
| NMSS | 0.015 | - |
| 6MWT | 0.103 | - |
| SPPB | 0.077 | - |
| TurnFR_CLL | 0.002 | - |
| TurnPR_DSR | 0.045 | - |
| TurnPR_CLR | 0.016 | - |
| TurnFL_PSI_SampEnGyr | 0.019 | - |
| TurnFR_PSI_SampEnGyr | 0.028 | - |
| TurnPL_LANK_SampEnAcc | 0.048 | - |
| TurnPR_LANK_SampEnAcc | 0.062 | - |
| FW_LANK_SampEnAcc | 0.034 | - |
| FW_RANK_MaxJerk | 0.008 | - |
| FW_PSI_MaxAcc | 0.063 | - |
| FW_T10_RmsGyr | 0.073 | - |
| BW_RANK_SampEnAcc | 0.029 | - |
| BW_PSI_MaxJerk | 0.009 | - |
| BW_T10_MaxAcc | 0.026 | - |
| UPDRS_total | - | 0.179 |
| BW_RANK_Max Angular Jerk | - | 0.123 |
| FW_LELB_MaxAcc | - | 0.073 |
| TurnFL_LANK_RmsAcc | - | 0.049 |
| FW_PSI_MeanAcc | - | 0.047 |
| TurnFR_RANK_RmsGyr | - | 0.026 |
| TurnFL_RANK_MaxJerk | - | 0.026 |
| TurnPR_PSI_MeanAcc | - | 0.021 |
| FW_LANK_Max Angular Jerk | - | 0.021 |
| FW_LELB_MeanAcc | - | 0.020 |
| SEE | - | 0.019 |
| FW_DSL | - | 0.019 |
| TurnPR_RANK_MaxGyr | - | 0.018 |
| TurnPR_LANK_Max Angular Jerk | - | 0.017 |
| TurnFR_RANK_SampEnAcc | - | 0.016 |
| ESS | - | 0.014 |
| ADL | HY | 0.110 | 0.016 |
| NFOG-Q | 0.058 | 0.050 |
| FW_RANK_Max Angular Jerk | 0.008 | 0.034 |
| UPDRS_II | 0.294 | - |
| UPDRS_III | 0.037 | - |
| FESK | 0.045 | - |
| SPPB | 0.098 | - |
| TurnFL_T10_SampEnGyr | 0.128 | - |
| TurnPR_LANK_MaxAcc | 0.040 | - |
| TurnPR_LANK_SampEnAcc | 0.014 | - |
| BW_LANK_MaxJerk | 0.051 | - |
| BW_RANK_SampEnAcc | 0.001 | - |
| UPDRS_total | - | 0.179 |
| BW_Max Angular Jerk_RANK | - | 0.123 |
| FW_LELB_MaxAcc | - | 0.073 |
| TurnFL_LANK_RmsAcc | - | 0.049 |
| FW_PSI_MeanAcc | - | 0.047 |
| TurnFR_RANK_RmsGyr | - | 0.026 |
| TurnFL_RANK_MaxJerk | - | 0.026 |
| TurnPR_PSI_MeanAcc | - | 0.021 |
| FW_LANK_Max Angular Jerk | - | 0.021 |
| FW_LELB_MeanAcc | - | 0.020 |
| SEE | - | 0.019 |
| FW_DSL | - | 0.019 |
| TurnPR_RANK_MaxGyr | - | 0.018 |
| TurnPR_LANK_Max Angular Jerk | - | 0.017 |
| TurnFR_RANK_SampEnAcc | - | 0.016 |
| ESS | - | 0.014 |
| Emotional Well being | BDI | 0.212 | 0.036 |
| BAI | 0.260 | 0.071 |
| NMSS | 0.004 | 0.040 |
| UPDRS_I | 0.012 | - |
| TurnFL_LANK_SampEnGyr | 0.011 | - |
| TurnFL_PSI_MaxGyr | 0.042 | - |
| TurnFR_LELB_MaxGyr | 0.010 | - |
| TurnPL_LANK_MaxGyr | 0.094 | - |
| TurnPL_RANK_MaxAcc | 0.002 | - |
| FW_PSI_SampEnGyr | 0.022 | - |
| TurnPL_RANK_MaxGyr | - | 0.040 |
| TurnFR_LELB_Max Angular Jerk | - | 0.038 |
| TurnFL_LELB_Mean_Acc | - | 0.032 |
| TurnPR_PSI_MaxAcc | - | 0.032 |
| TurnFR_LANK_MaxGyr | - | 0.031 |
| TurnFL_LANK_MaxGyr | - | 0.030 |
| TurnPL_LANK_Max Angular Jerk | - | 0.030 |
| BW_SLR | - | 0.029 |
| TurnFL_WS | - | 0.028 |
| ESS | - | 0.028 |
| BW_T10_MaxAcc | - | 0.027 |
| FW_LANK_Mean_Acc | - | 0.026 |
| FW_LANK_SampEnAcc | - | 0.026 |
| BW_LELB_MeanGyr | - | 0.025 |
| FW_RANK_MaxAcc | - | 0.025 |
| FW_LELB_MeanGyr | - | 0.024 |
| TurnPR_LELB_MaxGyr | - | 0.023 |
| 6MWT | - | 0.023 |
| SEE | - | 0.023 |
| BW_PSI_RmsGyr | - | 0.022 |
| TurnFL_LANK_RmsGyr | - | 0.022 |
| TurnFR_RELB_SampEnGyr | - | 0.022 |
| FW_DSR | - | 0.021 |
| BW_RELB_MaxGyr | - | 0.021 |

LASSO: Least Absolute Shrinkage and Selection Operator; XGBoost: Extreme Gradient Boosting; PDQ-39: Parkinson’s disease questionnaire-39; UPDRS: Unified Parkinson’s Disease Rating Scale; NMSS: Non-Motor Symptoms Scale; NFOG-Q: New Freezing of Gait Questionnaire; BAI: Beck anxiety inventory; BW: Backward walking; DSR: Right double support phase; TurnPL: Left turning at preferred speed; FESK: Falls efficacy scale-Korea; H&Y: Hoehn & yahr scale; FW: forward walking; Gyr: gyroscope; BDI: Beck depression inventory; TurnFL: Left turning at faster speed; SampEn: Sample entropy; LELB: Left elbow; SPPB: Short Physical Performance Battery; TurnPR: Right turning at preferred speed; CLL: Left contralateral phase; LANK: Left ankle; Acc: Acceleration; RANK: Right ankle; SLR: Right stride length; SEE: Self-efficacy for exercise; RELB: Right elbow; TurnFR: Right turning at faster speed; PDSS2: Parkinson’s Disease Sleep Scale 2nd version; Rms: Root mean square; Max Angular Jerk: Max angular velocity jerk; FSS: Fatigue Severity Scale; 6MWT: 6-Minute Walk Test; CLR: Right contralateral phase; ADL: Activity of daily living; ESS: Epworth Sleepiness Scale

**Supplementary table S2.** Correlations between the PDQ-39 total score and its subdimensions

|  | Mobility | ADL | Cognition | Emotional well-being | Social support | Communication | Bodily discomfort | Stigma |
| --- | --- | --- | --- | --- | --- | --- | --- | --- |
| PDQ-39 total | **0.816** | **0.647** | 0.541 | **0.645** | 0.431 | 0.583 | 0.452 | 0.270 |

PDQ-39: Parkinson’s disease questionnaire-39; ADL: Activity of daily living; Boldface indicates significant correlation (*r*>0.6) between PDQ-39 total score and its subdimensions.

**Supplementary table 3**. Methods for gait-associated parameters.

| Metric | Method | Definition |
| --- | --- | --- |
| Max Jerk () |  | The maximum rate of change of linear acceleration over time. |
| Max angular velocity jerk () |  | The maximum rate of change of angular velocity over time. |
| Mean acceleration () |  | The average magnitude of the linear acceleration vector from all time points. |
| Mean gyroscopes () |  | The average magnitude of the angular velocity vector from all time points. |
| Max acceleration () |  | The peak value of the linear acceleration vector of all times. |
| Max gyroscopes () |  | The peak value of the angular velocity vector of all times. |
| Rms acceleration () |  | The signal’s energy content over time. |
| Rms gyroscopes () |  | The variability and intensity of rotational movement. |
| Sample Entropy acceleration |  | The regularity and complexity of the acceleration time-series signal. |
| Sample Entropy gyroscopes |  | The regularity and complexity of the angular velocity time-series signal. |

RMS: root-mean-square; acc: acceleration; gyr: gyroscope; A: Total number of similar vector pairs of length m + 1 (i.e.,m + 1 consecutive data points) that remain within a defined tolerance r; B: Total number of similar vector pairs of length m (i.e.,m consecutive data points) within the same tolerance r.
